# Supplementary material for: Viral Infections in Burn Patients: A State-Of-The-Art Review
Source: PubMed Central journal article supplement (PMC7698518; doi:10.3390/v12111315), 2020-11-17
Supplement: viruses-12-01315-s001.pdf [file viruses-12-01315-s001.pdf]

Supplementary Materials: Table S1: An overview of the published reports regarding viral infections in burn wounds.

| Authors                     | Journal                         | Year of publication | Study type                              | Overall number of patients | Number of patients with viral infections | Age of patients (mean or range) | Sex (F – Female, M – male) | Total body surface area of burn (mean) | Viral infections           | Other infections                                                                                                                                                                                                                                                                                                                                                                                                                                                      | Clinical manifestations                         |
|-----------------------------|---------------------------------|---------------------|-----------------------------------------|----------------------------|------------------------------------------|---------------------------------|----------------------------|----------------------------------------|----------------------------|-----------------------------------------------------------------------------------------------------------------------------------------------------------------------------------------------------------------------------------------------------------------------------------------------------------------------------------------------------------------------------------------------------------------------------------------------------------------------|-------------------------------------------------|
| Wurzer et al. <sup>31</sup> | Burns                           | 2017                | Retrospective analysis (original study) | 613                        | 28                                       | ND                              | F: 247<br>M: 366           | 38%                                    | HSV-1<br>VZV<br>EBV<br>CMV | <i>P. aeruginosa</i>                                                                                                                                                                                                                                                                                                                                                                                                                                                  | Pneumonia<br>Sepsis                             |
| Sen et al. <sup>34</sup>    | Journal of Burn Care & Research | 2012                | Retrospective analysis (original study) | 71                         | 21                                       | 39.7 years (mean)               | ND                         | 45.9%                                  | HSV                        | <i>A. baumannii</i><br><i>P. aeruginosa</i><br><i>E. coli</i><br><i>C. albicans</i><br>Yeast<br><i>Enterococcus sp.</i><br>Methicillin-resistant <i>S. aureus</i><br><i>S. aureus</i><br><i>S. pneumoniae</i><br><i>Corynebacterium</i><br><i>E. cloacae</i><br><i>H. influenzae</i><br><i>S. viridans</i><br><i>S. marscencs</i><br><i>Fusarium sp.</i><br>Mould<br><i>E. aerogenes</i><br><i>Stenotrophomonas</i><br><i>Bacillus</i><br><i>Curvularia sp.</i><br>C. | Cutaneous HSV lesions<br>Respiratory infections |

|                                 |                                           |      |                                     |    |    |                     |                |      |       |                                                                                                        |                                                                                                                                      |
|---------------------------------|-------------------------------------------|------|-------------------------------------|----|----|---------------------|----------------|------|-------|--------------------------------------------------------------------------------------------------------|--------------------------------------------------------------------------------------------------------------------------------------|
|                                 |                                           |      |                                     |    |    |                     |                |      |       | <i>guillermondii</i><br><i>Paecilomyces</i><br><i>Aspergillus</i>                                      |                                                                                                                                      |
| Roberts et al. <sup>44</sup>    | Journal of Burn Care & Research           | 2013 | Prospective review (Original study) | 48 | 10 | 17-80 years (range) | F: 2*<br>M: 8* | ND   | HSV-1 | ND                                                                                                     | Facial herpetic lesions<br>Fever<br>Pain around mouth                                                                                |
| Peppercorn et al. <sup>38</sup> | Journal of Burn Care & Research           | 2010 | Case report                         | 1  | 1  | 58 years (mean)     | M: 1           | 68%  | HSV-2 | <i>A. flavus</i><br><i>E. cloacae</i>                                                                  | Fever<br>Corneal opacification and erosion<br>Gastrointestinal bleeding<br>Hypotension<br>Acute renal failure<br>Atrial fibrillation |
| McGill & Cartotto <sup>26</sup> | Burns                                     | 2000 | Case report                         | 1  | 1  | 10 months           | F: 1           | 12%  | HSV-1 | <i>S. aureus</i><br>B hemolytic<br><i>Streptococci</i><br><i>H. influenzae</i><br><i>P. aeruginosa</i> | Fever<br>Pneumonia<br>Vesicles and vesicopustules on the right thigh, forearm, cheek and left lower eyelid<br>Tongue ulceration      |
| Sobouti et al. <sup>32</sup>    | International Journal of Burns and Trauma | 2018 | Case report                         | 1  | 1  | 1 year              | M: 1           | 0.5% | HSV   | ND                                                                                                     | Blisters, vesicles and erythema within burn wound                                                                                    |

|                                    |                                                           |      |                                      |     |     |                   |                |       |                     |                                                                           |                                                                                                                                                                                                            |
|------------------------------------|-----------------------------------------------------------|------|--------------------------------------|-----|-----|-------------------|----------------|-------|---------------------|---------------------------------------------------------------------------|------------------------------------------------------------------------------------------------------------------------------------------------------------------------------------------------------------|
| Fidler et al.<br><sup>36</sup>     | The Journal of Trauma Injury, Infection and Critical Care | 2002 | Retrospective study (original study) | 95  | 14  | 44 years (mean)*  | ND             | ≥ 20% | HSV-1               | ND                                                                        | Facial rashes                                                                                                                                                                                              |
| Cook et al.<br><sup>37</sup>       | Journal of Burn Care & Research                           | 2017 | Case report                          | 1   | 1   | 58 years          | F: 1           | 40%   | HSV                 | <i>E. faecalis</i><br><i>P. aeruginosa</i><br>Candidiasis<br><i>Mucor</i> | Acute kidney injury<br>Acute tubular necrosis<br>Pneumonia<br>Hepatitis<br>Massive liver necrosis<br>Intracranial hemorrhage within the left basal ganglia<br>Intraperitoneal and retroperitoneal hematoma |
| Bourdarias et al.<br><sup>22</sup> | Burns                                                     | 1996 | Original study                       | 11  | 11  | 39 years (mean)   | F: 2<br>M: 9   | 22.9% | HSV-1               | ND                                                                        | Hyperthermia                                                                                                                                                                                               |
| Bordes et al.<br><sup>39</sup>     | Burns                                                     | 2009 | Case report                          | 1   | 1   | 43 years          | M: 1           | 65%   | HSV-1               | <i>P. aeruginosa</i><br>Candidiasis                                       | Sepsis<br>Septic shock<br>Pneumonia<br>Encephalitis                                                                                                                                                        |
| Werdin et al.<br><sup>40</sup>     | Journal of Clinical Microbiology                          | 2008 | Case report                          | 1   | 1   | 23 years          | M: 1           | 32%   | HSV-1<br>CMV<br>VZV | <i>S. epidermidis</i>                                                     | Fever                                                                                                                                                                                                      |
| Gong et al.<br><sup>64</sup>       | Acta Biochimica et Biophysica Sinica                      | 2013 | Original study                       | 160 | 108 | 32.3 years (mean) | F: 42<br>M: 66 | 35.3% | CMV                 | ND                                                                        | ND                                                                                                                                                                                                         |

|                          |                                             |      |                                    |     |    |                                              |                                          |                                |           |                                                                                   |                                                                                                                  |
|--------------------------|---------------------------------------------|------|------------------------------------|-----|----|----------------------------------------------|------------------------------------------|--------------------------------|-----------|-----------------------------------------------------------------------------------|------------------------------------------------------------------------------------------------------------------|
| Gibbs et al.<br>63       | Journal of Burn Care & Research             | 2015 | Case report                        | 1   | 1  | 41 years                                     | M: 1                                     | 72%                            | CMV       | ND                                                                                | colitis                                                                                                          |
| Bordes et al.<br>60      | Burns                                       | 2010 | Prospective study (original study) | 29  | 15 | 63 years (mean)                              | F: 7<br>M: 22                            | ≥ 15%                          | CMV       | Coagulase-negative <i>Staphylococcus</i>                                          | Pneumonia<br>Central venous catheters-related infections<br>Urinary catheter-related infections<br>Cholecystitis |
| Hamprecht et al.<br>62   | Journal of Clinical Microbiology            | 2005 | Case report                        | 1   | 1  | 40 years                                     | F: 1                                     | 65%                            | CMV       | <i>S. epidermidis</i><br><i>S. aureus</i>                                         | Pneumonia                                                                                                        |
| Hsu et al.<br>67         | Journal of Infectious Diseases              | 2016 | Case report                        | 1   | 1  | 4 years                                      | F: 1                                     | 35%                            | Orf Virus | ND                                                                                | ND                                                                                                               |
| Camilleri & Milner<br>74 | Burns                                       | 1996 | Case report                        | 1   | 1  | 4 years                                      | M: 1                                     | ND                             | HPV       | ND                                                                                | Keloid scar                                                                                                      |
| Salehi et al.<br>84      | International Wound Journal                 | 2015 | Original study                     | 969 | 5  | 39.4 years (mean)                            | M: 5*                                    | 29.3%*                         | HIV       | <i>S. aureus</i><br><i>C. perfringens</i>                                         | ND                                                                                                               |
| Mzewewa et al.<br>81     | The British Association of Plastic Surgeons | 2003 | Prospective study (original study) | 54  | 15 | 15-45 years (range)                          | F: 5*<br>M: 10*                          | 10-20% (range)                 | HIV       | <i>S. aureus</i><br><i>P. aeruginosa</i>                                          | ND                                                                                                               |
| James et al.<br>79       | Burns                                       | 2003 | Original study                     | 342 | 40 | Age ≤ 15: 5.2 years (mean)<br>Age > 16: 32.4 | Age ≤ 15: 122<br>M: 109<br>Age > 16: 109 | Age ≤ 15: 13%<br>Age > 16: 15% | HIV       | <i>E. coli</i><br><i>S. aureus</i><br><i>P. aeruginosa</i><br><i>S. paratyphi</i> | Sepsis<br>Hypovolemic shock<br>Diarrhoea<br>Tetanus<br>Pneumonia                                                 |

|                   |       |      |                   |     |    |                          |                  |      |     |    |                                                           |
|-------------------|-------|------|-------------------|-----|----|--------------------------|------------------|------|-----|----|-----------------------------------------------------------|
|                   |       |      |                   |     |    | years<br>(mean)          | F: 47<br>M: 64   |      |     |    | Respiratory<br>distress                                   |
| Edge et al.<br>78 | Burns | 2001 | Original<br>study | 661 | 33 | 31.6<br>years<br>(mean)* | F: 19*<br>M: 14* | 26%* | HIV | ND | Pneumonia<br>Renal failure<br>Septicaemia<br>Tuberculosis |

F – Female; M – Male; ND – No Data; HSV-1 – Herpes Simplex Virus 1; VZV – Varicella Zoster Virus; EBV – Epstein-Barr Virus; CMV – Cytomegalovirus; HSV – Herpes Simplex Virus; HSV-2 – Herpes Simplex Virus 2; HPV – Human Papilloma Virus; HIV – Human Immunodeficiency Virus; \* - among viral infected patients
